# Supplementary material for: How many faces do people know?
Source: PubMed Central journal article supplement (PMC6191703; doi:10.1098/rspb.2018.1319), 2018-10-10
Supplement: rspb20181319supp1.pdf [file rspb20181319supp1.pdf]

| Demographics |        |              | Measured Recall |            | Projected Recall |            | Recognition |             |            | Recall-to-recognition Ratio |             | Apply r:r Ratio |                | Less stringent recognition criterion (either image A or image B) |             |             |             |             |             |
|--------------|--------|--------------|-----------------|------------|------------------|------------|-------------|-------------|------------|-----------------------------|-------------|-----------------|----------------|------------------------------------------------------------------|-------------|-------------|-------------|-------------|-------------|
| Participant  | Gender | Age          | Personal        | Famous     | Personal         | Famous     | Version A   | Version B   | A & B      | Recalled in DB              | r:r Ratio   | Recall total    | Rt x r:r Ratio | No-No                                                            | Alt. Recog  | Alt. Ratio  | Alt. Pers   | Alt. Fam    | Alt. Total  |
| 1            | F      | 22           | 524             | 327        | 794              | 444        | 1470        | 1492        | 990        | 206                         | 4.81        | 1239            | 5952           | 1469                                                             | 1972        | 9.57        | 5016        | 3130        | 8146        |
| 2            | F      | 61           | 225             | 178        | 341              | 242        | 1935        | 2035        | 1018       | 122                         | 8.34        | 583             | 4864           | 1018                                                             | 2423        | 19.86       | 4469        | 3535        | 8004        |
| 3            | F      | 27           | 226             | 262        | 342              | 356        | 1040        | 934         | 610        | 162                         | 3.77        | 699             | 2631           | 2077                                                             | 1364        | 8.42        | 1903        | 2206        | 4109        |
| 4            | M      | 20           | 443             | 313        | 671              | 425        | 829         | 634         | 366        | 224                         | 1.63        | 1097            | 1792           | 2344                                                             | 1097        | 4.90        | 2170        | 1533        | 3702        |
| 5            | F      | 19           | 167             | 314        | 253              | 427        | 1133        | 1321        | 564        | 154                         | 3.66        | 680             | 2490           | 1551                                                             | 1890        | 12.27       | 2050        | 3854        | 5903        |
| 6            | M      | 22           | 478             | 244        | 724              | 332        | 1271        | 1670        | 882        | 144                         | 6.13        | 1056            | 6468           | 1382                                                             | 2059        | 14.30       | 6835        | 3489        | 10324       |
| 7            | F      | 19           | 436             | 264        | 661              | 359        | 812         | 945         | 572        | 165                         | 3.47        | 1020            | 3534           | 2256                                                             | 1185        | 7.18        | 3131        | 1896        | 5027        |
| 8            | M      | 18           | 437             | 170        | 662              | 231        | 1680        | 1741        | 859        | 101                         | 8.50        | 893             | 7597           | 879                                                              | 2562        | 25.37       | 11085       | 4312        | 15397       |
| 9            | F      | 20           | 326             | 194        | 494              | 264        | 411         | 469         | 292        | 75                          | 3.89        | 758             | 2950           | 2853                                                             | 588         | 7.84        | 2556        | 1521        | 4077        |
| 10           | M      | 22           | 278             | 244        | 421              | 332        | 401         | 473         | 333        | 159                         | 2.09        | 753             | 1577           | 2900                                                             | 541         | 3.40        | 946         | 830         | 1776        |
| 11           | F      | 22           | 360             | 274        | 546              | 372        | 606         | 673         | 327        | 120                         | 2.73        | 918             | 2501           | 2488                                                             | 953         | 7.94        | 2859        | 2176        | 5035        |
| 12           | M      | 21           | 393             | 361        | 596              | 491        | 1930        | 1789        | 1453       | 246                         | 5.91        | 1086            | 6416           | 1175                                                             | 2266        | 9.21        | 3620        | 3325        | 6945        |
| 13           | F      | 21           | 338             | 169        | 512              | 230        | 490         | 588         | 324        | 99                          | 3.27        | 742             | 2428           | 2687                                                             | 754         | 7.62        | 2574        | 1287        | 3861        |
| 14           | F      | 47           | 424             | 372        | 643              | 506        | 509         | 536         | 329        | 226                         | 1.46        | 1148            | 1671           | 2725                                                             | 716         | 3.17        | 1343        | 1179        | 2522        |
| 15           | F      | 20           | 273             | 285        | 414              | 387        | 1239        | 1315        | 1029       | 229                         | 4.49        | 801             | 3600           | 1916                                                             | 1525        | 6.66        | 1818        | 1898        | 3716        |
| 16           | M      | 21           | 389             | 407        | 589              | 553        | 1796        | 1736        | 1427       | 244                         | 5.85        | 1143            | 6683           | 1335                                                             | 2106        | 8.63        | 3358        | 3513        | 6870        |
| 17           | M      | 22           | 437             | 396        | 662              | 538        | 508         | 543         | 231        | 269                         | 0.86        | 1200            | 1031           | 2621                                                             | 820         | 3.05        | 1332        | 1207        | 2539        |
| 18           | F      | 22           | 420             | 308        | 636              | 419        | 1292        | 1366        | 999        | 225                         | 4.44        | 1055            | 4685           | 1782                                                             | 1659        | 7.37        | 3097        | 2271        | 5368        |
| 19           | F      | 23           | 419             | 310        | 635              | 421        | 1156        | 1210        | 812        | 178                         | 4.56        | 1056            | 4819           | 1887                                                             | 1554        | 8.73        | 3658        | 2706        | 6364        |
| 20           | F      | 22           | 346             | 333        | 524              | 453        | 1300        | 1280        | 918        | 262                         | 3.50        | 977             | 3423           | 1779                                                             | 1662        | 6.34        | 2195        | 2112        | 4307        |
| 21           | F      | 21           | 495             | 394        | 750              | 536        | 1232        | 1618        | 943        | 203                         | 4.65        | 1286            | 5972           | 1534                                                             | 1907        | 9.39        | 4650        | 3701        | 8351        |
| 22           | F      | 23           | 309             | 296        | 468              | 402        | 599         | 717         | 434        | 175                         | 2.48        | 871             | 2159           | 2559                                                             | 882         | 5.04        | 1557        | 1492        | 3049        |
| 23           | M      | 22           | 301             | 279        | 456              | 379        | 1803        | 1942        | 1335       | 130                         | 10.27       | 835             | 8579           | 1031                                                             | 2410        | 18.54       | 5580        | 5172        | 10752       |
| 24           | M      | 27           | 381             | 337        | 577              | 458        | 1189        | 1388        | 921        | 144                         | 6.40        | 1035            | 6622           | 1785                                                             | 1656        | 11.50       | 4382        | 3876        | 8257        |
| 25           | M      | 22           | 236             | 231        | 358              | 314        | 1996        | 1873        | 1404       | 170                         | 8.26        | 672             | 5547           | 976                                                              | 2465        | 14.50       | 3422        | 3350        | 6772        |
| <b>Mean</b>  |        | <b>24.24</b> | <b>362</b>      | <b>290</b> | <b>549</b>       | <b>395</b> | <b>1145</b> | <b>1212</b> | <b>775</b> | <b>177</b>                  | <b>4.62</b> | <b>944</b>      | <b>4240</b>    | <b>1880</b>                                                      | <b>1561</b> | <b>9.63</b> | <b>3424</b> | <b>2623</b> | <b>6047</b> |
| SD           |        | 9.21         | 93              | 69         | 141              | 94         | 518         | 520         | 389        | 54                          | 2.39        | 197             | 2136           | 642                                                              | 642         | 5.40        | 2154        | 1152        | 3091        |
| Min          |        |              | 167             | 169        | 253              | 230        | 401         | 469         | 231        |                             |             | 583             | 1031           |                                                                  |             |             |             |             | 1776        |
| Max          |        |              | 524             | 407        | 794              | 553        | 1996        | 2035        | 1453       |                             |             | 1286            | 8579           |                                                                  |             |             |             |             | 15397       |
